CORRECTION

# Correction: Jasmonate signalling pathway in strawberry: Genome-wide identification, molecular characterization and expression of *JAZs* and *MYCs* during fruit development and ripening

Adrián Garrido-Bigotes, Nicolás E. Figueroa, Pablo M. Figueroa, Carlos R. Figueroa

Several genes are labeled incorrectly in [Fig 7](#). The authors have provided a corrected version here.

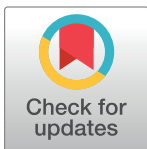

 OPEN ACCESS

**Citation:** Garrido-Bigotes A, Figueroa NE, Figueroa PM, Figueroa CR (2018) Correction: Jasmonate signalling pathway in strawberry: Genome-wide identification, molecular characterization and expression of *JAZs* and *MYCs* during fruit development and ripening. PLoS ONE 13(10): e0206559. <https://doi.org/10.1371/journal.pone.0206559>

**Published:** October 23, 2018

**Copyright:** © 2018 Garrido-Bigotes et al. This is an open access article distributed under the terms of the [Creative Commons Attribution License](#), which permits unrestricted use, distribution, and reproduction in any medium, provided the original author and source are credited.

A

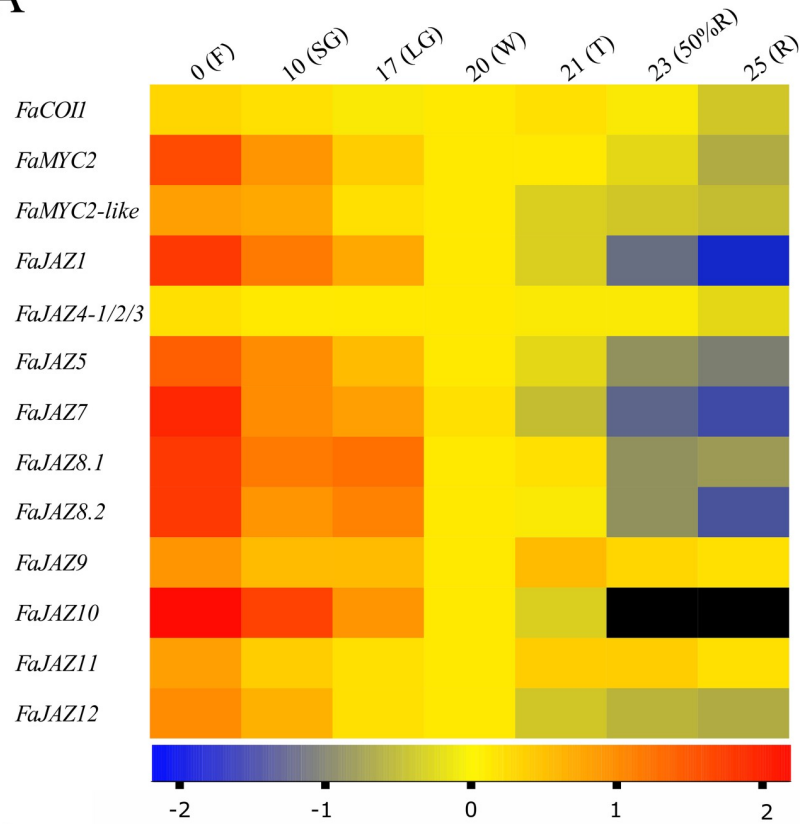

B

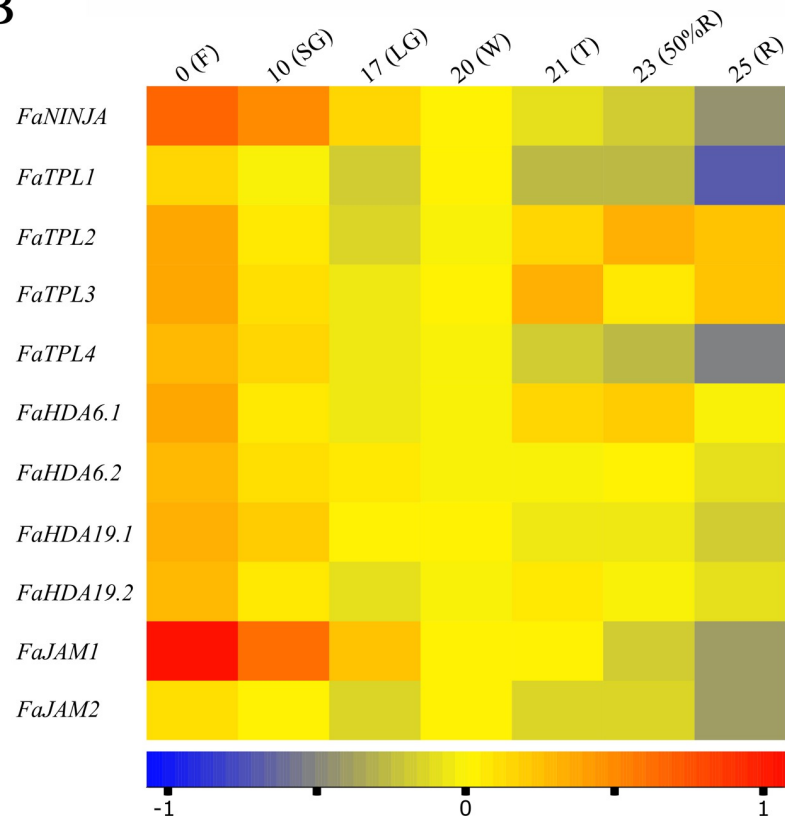

**Fig 7. Expression heatmaps of *Fragaria × ananassa* JA signalling-related genes during fruit development and ripening.** Expression heatmaps of *FaCOI1*, *FaMYCs*, *FaJAZs* (A) and *FaNINJA*, *FaTPLs*, *FaHDAs*, *FaJAMs* (B). The Log-transformed values of relative expression levels based on RT-qPCR assays were used to perform heatmaps. The color scale represents relative expression levels with red and blue colors as high and low values, respectively. Black means no detection. The expression level of *FaGAPDH* was used as reference gene to normalize each reaction. The data was from three biological and three technical replicates. Developmental stages correspond to 0 (flowering, F), 10 (small green, SG), 17 (large green, LG), 20 (white, W), 21 (turning, T), 23 (50% red receptacle, 50%R) and 25 (100% red receptacle, 100%R) days after anthesis (DAA) in *F. × ananassa* cv. Aromas. JAZ, jasmonate ZIM-Domain.

<https://doi.org/10.1371/journal.pone.0206559.g001>

## Reference

1. Garrido-Bigotes A, Figueroa NE, Figueroa PM, Figueroa CR (2018) Jasmonate signalling pathway in strawberry: Genome-wide identification, molecular characterization and expression of *JAZs* and *MYCs* during fruit development and ripening. PLoS ONE 13(5): e0197118. <https://doi.org/10.1371/journal.pone.0197118> PMID: 29746533
